# Supplementary material
Source: publisher figshare collection journal article supplement (https://gsajournals.figshare.com/articles/dataset/_/8001572)
Supplement: Supplementary file 1 [file 2]

## Sheet: Sheet2
Waits Marker	NCBI Scaffold ID	Waits Position	Waits Map (LG)	Final RAD Map (LG)	Platyfish Map (LG)	RAD Marker Count	Different Between Microsat and RAD Maps?	Homology Supports RAD Map?
AHR1_1530	NW_012234474.1	0	1	1	7	10	NO	YES
AHR1_161	NW_012234474.1	0	1	1	7	10	NO	YES
AHR1_948	NW_012234474.1	0	1	1	7	10	NO	YES
AHR2_1929	NW_012234474.1	0	1	1	7	10	NO	YES
AHR2_792	NW_012234474.1	0	1	1	7	10	NO	YES
AHR1_2289	NW_012234474.1	0	1	1	NA	10	NO	YES
Fhe_2242	NW_012234474.1	12.3	1	1	NA	10	NO	YES
xTC18968_395	NW_012234322.1	36.3	1	1	7	8	NO	YES
Fhe_2088	NW_012234395.1	67.7	1	1	7	10	NO	YES
Fhe_2319	NW_012224471.1	68.2	1	1	NA	5	NO	YES
FhCA-22	NW_012234281.1	81.6	1	1	7	10	NO	YES
Fhe_1114	NW_012234281.1	81.6	1	1	7	10	NO	YES
Fh105	NW_012234513.1	86.9	1	1	7	1	NO	YES
Fhe_2211	NW_012234445.1	103.9	1	1	11	8	NO	NO
x1172_59	NW_012234414.1	129.7	1	1	7	10	NO	YES
Fhe_2129	NW_012224837.1	0	2	2	5	2	NO	YES
Fhe_2327	NW_012225599.1	26.8	2	NA	NA	0	NO	YES
Fhe_462	NW_012234560.1	29.4	2	2	5	6	NO	YES
Fhe_68	NW_012225417.1	39.6	2	NA	22	0	NO	YES
Fhe_2337	NW_012234293.1	41.3	2	2	20	8	NO	NO
Fhe_2100	NW_012234392.1	63.1	2	2	3	6	NO	YES
xTC15246_1153	NW_012234566.1	63.6	2	2	5	6	NO	YES
CYP3A_1166	NW_012234566.1	66.2	2	2	5	6	NO	YES
Fhe_504	NW_012234566.1	68.4	2	2	5	6	NO	YES
xTC18885_458	NW_012234307.1	74.8	2	2	5	10	NO	YES
xTC23138	NW_012234307.1	74.8	2	2	5	10	NO	YES
Fhe_2092	NW_012234307.1	74.8	2	2	NA	10	NO	YES
Fhe_2254	NW_012224520.1	87.1	2	2	4	6	NO	NO
xTC17598_212	NW_012224627.1	0	3	3	6	7	NO	YES
Fhe_2324	NW_012234254.1	18.8	3	3	14	10	NO	NO
Fhe_2321	NW_012234437.1	35.7	3	3	NA	9	NO	YES
Fhe_2115	NW_012234254.1	54.5	3	3	6	10	NO	YES
Fhe_416	NW_012234356.1	64.9	3	3	6	10	NO	YES
Fhe_2016	NW_012231989.1	0	4	NA	NA	0	NO	YES
Fhe_15	NW_012234306.1	2.3	4	4	23	10	NO	YES
xTC19233_230	NW_012224401.1	5.7	4	4	23	10	NO	YES
Fhe_2102	NW_012224401.1	8.8	4	4	23	10	NO	YES
xTC16491_605	NW_012224401.1	24	4	4	NA	10	NO	YES
Fhe_606	NW_012234298.1	29	4	4	23	7	NO	YES
x141_135	NW_012234260.1	40.3	4	4	23	10	NO	YES
Fhe_524	NW_012234260.1	41.7	4	4	23	10	NO	YES
Fhe_465	NW_012234260.1	43.7	4	4	23	10	NO	YES
FhATG-B4	NW_012234260.1	46.2	4	4	23	10	NO	YES
Fhe_2166	NW_012234350.1	87.8	4	4	11	10	NO	NO
Fhe_2279	NW_012234288.1	117	4	16	21	10	YES	YES
Fhe_560	NW_012234445.1	133.2	4	1	7	8	YES	YES
Thioredoxin_582	NW_012224604.1	137.5	4	23	14	10	YES	YES
xTC17861_587	NW_012224604.1	137.5	4	23	14	10	YES	YES
Fhe_358	NW_012224575.1	0	5	5	4	10	NO	YES
xTC20611_427	NW_012224574.1	7.2	5	NA	4	0	NO	NA
Fhe_2104	NW_012234483.1	27	5	5	4	9	NO	YES
FhCA-1	NW_012234386.1	43.3	5	5	NA	7	NO	YES
xTC23373_114	NW_012224574.1	47.8	5	NA	4	0	NO	NA
CYP1A_2140	NW_012234324.1	50.4	5	5	4	10	NO	YES
CYP1A_PP-2	NW_012234324.1	50.4	5	5	4	10	NO	YES
CYP1A_2017	NW_012234324.1	50.4	5	5	NA	10	NO	YES
xTC15749_698	NW_012234527.1	54.7	5	5	4	10	NO	YES
Fhe_2069	NW_012234319.1	60.4	5	5	4	8	NO	YES
xTC21107_340	NW_012224574.1	80.9	5	NA	NA	0	NO	YES
xTC15240_1242	NW_012224869.1	84	5	5	NA	10	NO	YES
Fhe_2020	NW_012234540.1	84.8	5	5	4	9	NO	YES
Fhe_2183	NW_012224410.1	95.6	5	5	7	8	NO	NO
xTC21903_411	NW_012224574.1	117.5	5	NA	NA	0	NO	YES
Fhe_2225	NW_012224436.1	0	6	6	13	5	NO	YES
x1197_172	NW_012224599.1	7	6	6	NA	4	NO	YES
Fhe_2155	NW_012234418.1	34	6	6	13	10	NO	YES
Fhe_1185	NW_012234320.1	0	7	21	18	5	YES	YES
Fhe_2269	NW_012234419.1	19	7	7	1	10	NO	YES
FhCA-21	NW_012234397.1	27.1	7	7	NA	8	NO	YES
xTC22179_366	NW_012225069.1	30.4	7	NA	1	0	NO	YES
Fhe_2008	NW_012224408.1	31.4	7	7	1	5	NO	YES
xTC15560_283	NW_012224408.1	31.4	7	7	1	5	NO	YES
xTC23676_534	NW_012224408.1	31.4	7	7	1	5	NO	YES
Fhe_2137	NW_012234452.1	35.7	7	7	10	10	NO	NO
Fhe_108	NW_012234347.1	37.2	7	7	1	10	NO	YES
Fhe_1175	NW_012234347.1	41.4	7	7	1	10	NO	YES
Fhe_1236	NW_012234347.1	44	7	7	1	10	NO	YES
Fhe_2062	NW_012234347.1	46.3	7	7	NA	10	NO	YES
Fhe_61	NW_012224418.1	54.3	7	7	1	5	NO	YES
Fhe_2204	NW_012234436.1	55.5	7	7	1	10	NO	YES
x1461_65	NW_012234261.1	65.3	7	7	1	10	NO	YES
Fhe_2346	NW_012234397.1	65.3	7	7	24	8	NO	YES
xTC17250_714	NW_012234397.1	67.9	7	7	1	8	NO	YES
Fhe_2245	NW_012234458.1	74.6	7	7	NA	10	NO	YES
xTC15438_91	NW_012224547.1	81.3	7	7	1	1	NO	YES
Fhe_2196	NW_012234551.1	0	8	8	NA	10	NO	YES
xTC19113_397	NW_012234546.1	6	8	8	3	9	NO	YES
Hepcidin2_399	NW_012226351.1	10.7	8	NA	NA	0	NO	YES
xTC20491_128	NW_012234344.1	11.2	8	8	3	10	NO	YES
Fhe_124	NW_012226351.1	11.3	8	NA	3	0	NO	NA
Fhe_1035	NW_012234365.1	12.2	8	9	16	10	YES	YES
x886_60	NW_012225134.1	13.1	8	8	NA	4	NO	YES
Fhe_2121	NW_012234480.1	18.8	8	8	1	10	NO	NO
xTC20964_350	NW_012234546.1	19.8	8	8	3	9	NO	YES
Fhe_2101	NW_012234267.1	27.8	8	8	3	10	NO	YES
xTC18973_332	NW_012234546.1	32.1	8	8	NA	9	NO	YES
Fhe_2003	NW_012234546.1	35	8	8	3	9	NO	YES
Fhe_2235	NW_012234462.1	38.1	8	8	3	10	NO	YES
xTC17350_917	NW_012234552.1	43.3	8	8	3	8	NO	YES
x510_115	NW_012234480.1	44.3	8	8	3	10	NO	YES
Fhe_645	NW_012226848.1	55.8	8	NA	3	0	NO	NA
Fhe_2026	NW_012234442.1	63.4	8	8	NA	7	NO	YES
xTC19981_424	NW_012224630.1	0	9	9	16	8	NO	YES
xTC16765_535	NW_012225198.1	4.8	9	9	16	4	NO	YES
MLRQ_363	NW_012234482.1	26.9	9	9	16	8	NO	YES
Fhe_19	NW_012224422.1	28.7	9	9	16	6	NO	YES
Titin_478	NW_012234365.1	30.5	9	9	16	10	NO	YES
xTC17783_489	NW_012234365.1	30.5	9	9	16	10	NO	YES
x1114_160	NW_012226988.1	30.5	9	NA	NA	0	NO	YES
xTC18048_243	NW_012234477.1	39.3	9	9	16	9	NO	YES
xTC18378_211	NW_012234477.1	43.9	9	9	16	9	NO	YES
NADH10_107	NW_012234370.1	51.5	9	9	16	9	NO	YES
NADH10_439	NW_012234370.1	51.5	9	9	16	9	NO	YES
xTC15606_316	NW_012234370.1	51.5	9	9	16	9	NO	YES
xTC17549_296	NW_012234370.1	51.5	9	9	16	9	NO	YES
Fhe_2222	NW_012234370.1	51.5	9	9	NA	9	NO	YES
xTC18695_98	NW_012234477.1	56.1	9	9	16	9	NO	YES
xTC18760_95	NW_012234482.1	65.3	9	9	16	8	NO	YES
xTC19271_848	NW_012234315.1	87.1	9	9	16	10	NO	YES
Fhe_2098	NW_012225242.1	0	10	NA	NA	0	NO	YES
xTC20922_474	NW_012234266.1	50.7	10	10	2	9	NO	YES
Fhe_841	NW_012224450.1	68.2	10	10	2	3	NO	YES
xTC20024_839	NW_012224448.1	84.2	10	10	2	5	NO	YES
Fhe_2275	NW_012234517.1	88.3	10	10	2	10	NO	YES
Fhe_2075	NW_012234508.1	92.1	10	10	2	8	NO	YES
xTC15539_236	NW_012234508.1	96	10	10	2	8	NO	YES
xTC17164_498	NW_012234508.1	96	10	10	2	8	NO	YES
Fhe_2286	NW_012224950.1	97.4	10	10	2	2	NO	YES
Fhe_582	NW_012234428.1	100	10	10	2	8	NO	YES
Fhe_797	NW_012224698.1	104	10	10	2	10	NO	YES
FhATG-B103	NW_012234311.1	106.4	10	NA	2	0	NO	YES
Fhe_2246	NW_012224642.1	0	11	11	20	1	NO	NO
Fhe_2190	NW_012224948.1	0	11	11	8	1	NO	YES
Fhe_2164	NW_012224449.1	20	11	11	8	5	NO	YES
Fhe_2179	NW_012234299.1	46.3	11	11	NA	10	NO	YES
Fhe_495	NW_012234299.1	51.6	11	11	8	10	NO	YES
Fhe_2126	NW_012234299.1	57.2	11	11	8	10	NO	YES
Fhe_2084	NW_012234299.1	68.8	11	11	7	10	NO	NO
Fhe_552	NW_012224641.1	108.2	11	14	8	10	YES	NO
Fhe_7	NW_012224478.1	0	12	12	10	3	NO	YES
Fhe_2176	NW_012234498.1	28.2	12	12	NA	7	NO	YES
Fhe_533	NW_012224541.1	51.2	12	12	2	1	NO	YES
Fhe_1115	NW_012234292.1	58.8	12	12	10	10	NO	YES
Fhe_2262	NW_012224416.1	61	12	12	15	10	NO	YES
x1179_176	NW_012224409.1	89.1	12	12	10	6	NO	YES
Fhe_2087	NW_012234292.1	106	12	12	10	10	NO	YES
Fhe_366	NW_012227336.1	108.1	12	NA	10	0	NO	YES
Fhe_2041	NW_012224416.1	117.6	12	12	10	10	NO	YES
Fhe_457	NW_012234313.1	0	13	13	NA	10	NO	YES
LDHB654	NW_012234313.1	14.7	13	13	NA	10	NO	YES
LDHB1033	NW_012234313.1	15.9	13	13	NA	10	NO	YES
x1363_196	NW_012234450.1	21.4	13	13	NA	8	NO	YES
Fhe_198	NW_012234387.1	26.6	13	13	17	10	NO	YES
Fhe_2240	NW_012224403.1	41.2	13	13	17	10	NO	YES
Fhe_903	NW_012234422.1	0	14	14	19	9	NO	YES
Fhe_2156	NW_012234258.1	8.8	14	14	NA	10	NO	YES
B08	NW_012234422.1	19.3	14	14	19	9	NO	YES
Fhe_2085	NW_012234504.1	33.1	14	NA	13	0	NO	YES
Fhe_2152	NW_012234312.1	37.6	14	23	NA	10	YES	YES
Fhe_2270	NW_012224584.1	39.5	14	14	NA	1	NO	YES
Fhe_2221	NW_012225559.1	41.1	14	NA	19	0	NO	YES
Fhe_2064	NW_012234359.1	68.2	14	14	2	10	NO	NO
FhCA-A3	NW_012227079.1	0	15	NA	NA	0	NO	YES
Fhe_02	NW_012227079.1	0	15	NA	NA	0	NO	YES
Fhe_2083	NW_012234412.1	25.3	15	15	22	3	NO	YES
xTC17025_152	NW_012226212.1	36.9	15	15	NA	10	NO	YES
xTC18400_387	NW_012226212.1	37.5	15	15	NA	10	NO	YES
xTC16919_163	NW_012226212.1	39.7	15	15	22	10	NO	YES
x1173_79	NW_012234518.1	45.1	15	15	22	10	NO	YES
xTC20553_244	NW_012234518.1	45.1	15	15	22	10	NO	YES
ANGIOTENSIN	NW_012234278.1	50.4	15	15	22	10	NO	YES
x259_62	NW_012234287.1	55.3	15	15	NA	10	NO	YES
Fhe_113	NW_012234518.1	86.7	15	15	22	8	NO	YES
Fhe_2244	NW_012234543.1	138.9	15	15	22	10	NO	YES
Fhe_2249	NW_012234270.1	141.5	15	10	NA	10	YES	NA
xTC15839_160	NW_012224473.1	141.5	15	8	3	6	YES	YES
Fhe_2028	NW_012234270.1	144.9	15	10	NA	10	YES	NA
Fhe_2160	NW_012224697.1	0	16	16	4	10	NO	NO
Fhe_414	NW_012224707.1	34	16	16	21	4	NO	YES
Fhe_2309	NW_012234277.1	37.5	16	16	21	10	NO	YES
xTC15871_290	NW_012225190.1	39	16	16	21	10	NO	YES
xTC20430_111	NW_012224722.1	0	17	17	11	10	NO	YES
xTC20991_213	NW_012224722.1	0	17	17	11	10	NO	YES
Fhe_2317	NW_012234440.1	32.2	17	9	16	7	YES	YES
Fhe_62	NW_012234293.1	33.8	17	2	5	8	YES	YES
x1081_108	NW_012234355.1	75.8	17	17	11	10	NO	YES
x1270_147	NW_012234318.1	77.1	17	17	11	9	NO	YES
Fhe_408	NW_012224431.1	0	18	6	13	9	YES	YES
Fhe_328	NW_012234345.1	23.8	18	6	13	9	YES	YES
Fhe_550	NW_012224771.1	45.8	18	6	NA	7	YES	NA
xTC20997_423	NW_012234534.1	0	19	19	20	9	NO	NO
Fhe_2267	NW_012234439.1	48.2	19	19	20	8	NO	YES
Fhe_2055	NW_012224754.1	52.5	19	NA	NA	0	NO	YES
Fhe_2128	NW_012234375.1	55	19	19	20	10	NO	YES
Fhe_1121	NW_012234382.1	61.8	19	19	20	10	NO	YES
Fhe_2110	NW_012234346.1	80.6	19	19	20	9	NO	YES
CathZ_624	NW_012234529.1	81.7	19	19	20	10	NO	YES
Fhe_2219	NW_012234346.1	82.1	19	19	20	9	NO	YES
xTC18652_242	NW_012234348.1	87.5	19	19	20	10	NO	YES
Fhe_2048	NW_012224479.1	99.2	19	19	NA	10	NO	YES
Fhe_2151	NW_012234383.1	103.9	19	19	20	8	NO	YES
Fhe_2133	NW_012227142.1	153.5	19	NA	NA	0	NO	YES
Fhe_2231	NW_012234255.1	0	20	20	14	10	NO	NO
xTC16319_186	NW_012234301.1	4.9	20	20	9	10	NO	YES
xTC15464_395	NW_012234525.1	8.5	20	20	9	1	NO	YES
Fhe_2227	NW_012234360.1	8.5	20	20	NA	8	NO	YES
x97_157	NW_012225237.1	61.8	20	NA	NA	0	NO	YES
xTC17645_349	NW_012225136.1	0	21	21	18	6	NO	YES
x1223_147	NW_012224517.1	7	21	21	NA	10	NO	YES
Fhe_558	NW_012234317.1	45.2	21	21	18	8	NO	YES
Fhe_2180	NW_012226213.1	64	21	21	18	5	NO	YES
FhATG-B128	NW_012226213.1	70.7	21	21	18	5	NO	YES
Fhe_1205	NW_012234404.1	103.3	21	21	18	5	NO	YES
Fhe_2073	NW_012226138.1	142.3	21	NA	18	0	NO	YES
Fhe_2277	NW_012225211.1	185.3	21	21	NA	1	NO	YES
FhAGAT-C1	NW_012225098.1	0	22	NA	NA	0	NO	YES
Fhe_32	NW_012225098.1	0	22	NA	NA	0	NO	YES
Fhe_2032	NW_012224811.1	22.2	22	NA	15	0	NO	YES
Fhe_2181	NW_012234327.1	25.9	22	22	15	9	NO	YES
HSP90_775	NW_012234329.1	83.8	22	22	15	10	NO	YES
Fhe_1124	NW_012234310.1	128.3	22	22	15	10	NO	YES
Fhe_1139	NW_012234327.1	151.5	22	22	15	9	NO	YES
Fhe_2255	NW_012234329.1	195	22	22	24	10	NO	YES
Fhe_322	NW_012234284.1	0	23	17	11	9	YES	YES
Fhe_326	NW_012234284.1	0	23	17	11	9	YES	YES
Fhe_2189	NW_012224425.1	8.9	23	17	NA	8	YES	YES
Fhe_2202	NW_012234475.1	0	24	24	NA	3	NO	YES
Fhe_2031	NW_012225115.1	0.6	24	24	12	2	NO	YES
Fhe_2015	NW_012225883.1	51.1	24	24	NA	1	NO	YES
