# Supplementary material
Source: publisher figshare collection journal article supplement (https://gsajournals.figshare.com/articles/dataset/_/8001572)
Supplement: Supplementary file 3 [file 2]

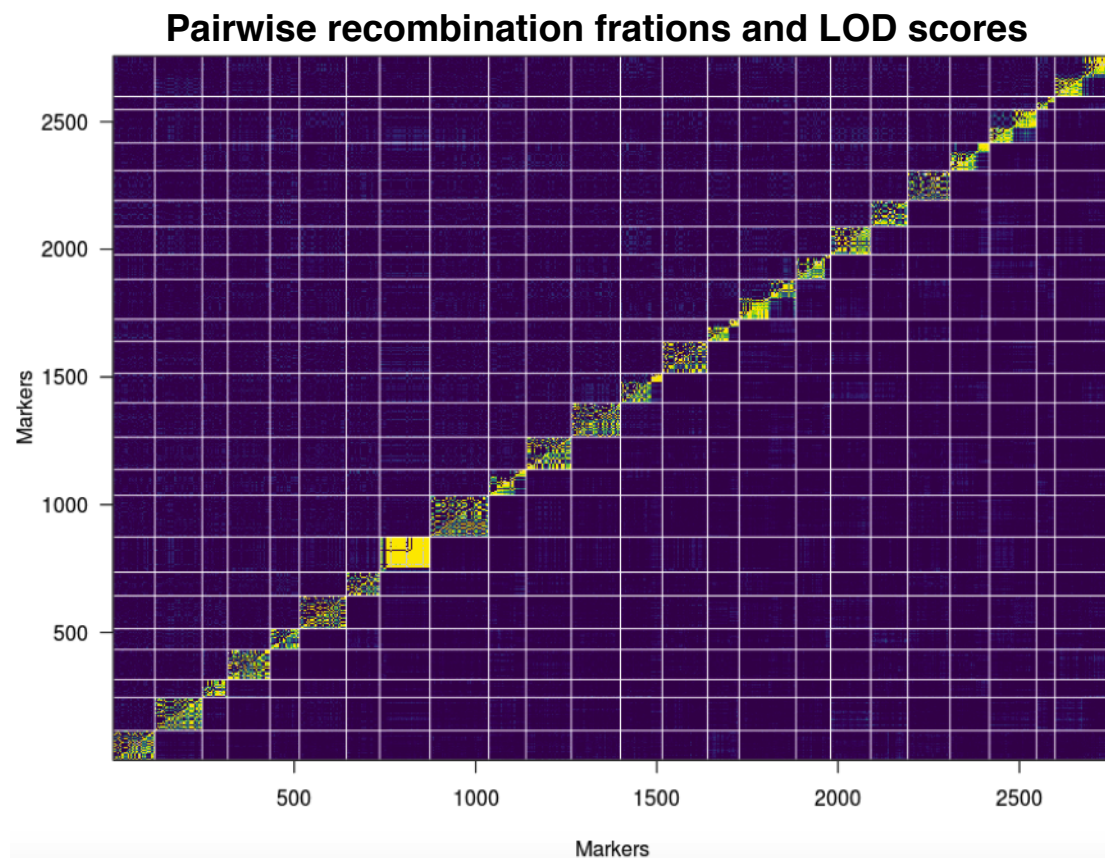

Figure S2. Linkage map assignment heat map of recombination fractions and LOD scores for scaffolds with sufficient markers for mapping. Cool colors indicate unlinked markers with higher recombination fraction and low likelihood of linkage (LOD score). Iteratively visualizing LOD and manually assigning scaffolds resulted in 24 unlinked LGs.
