# Supplementary material
Source: publisher figshare collection journal article supplement (https://gsajournals.figshare.com/articles/dataset/_/8001572)
Supplement: Supplementary file 4 [file 2]

A

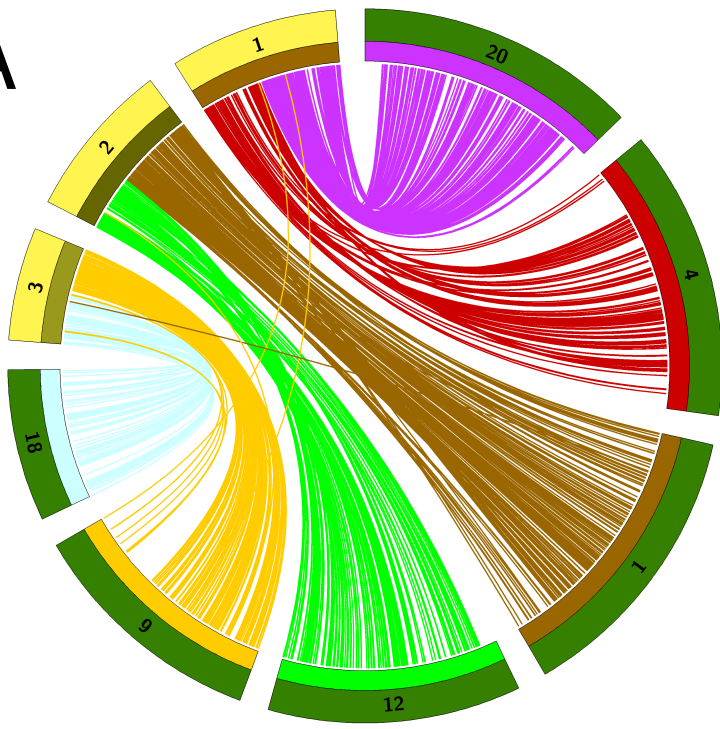

Tetraodon x Killifish  
Fusions

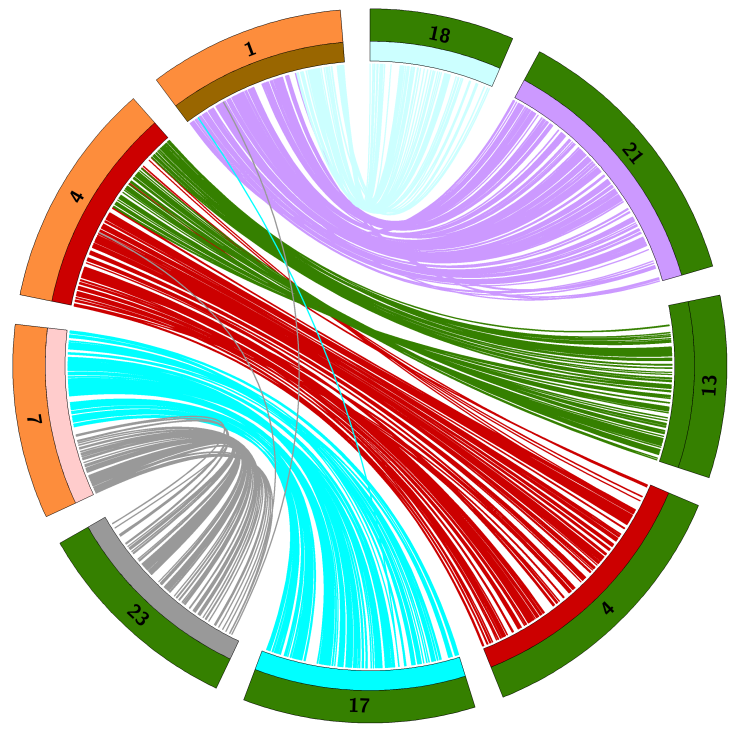

Stickleback x Killifish  
Fusions

B

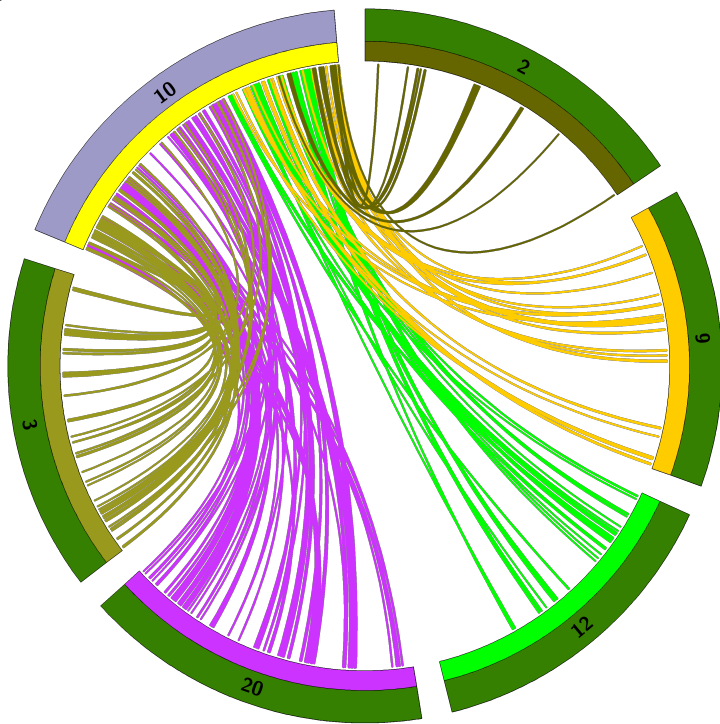

Gar x Killifish  
Fusion In Gar  
Duplication and  
RGL in Killifish

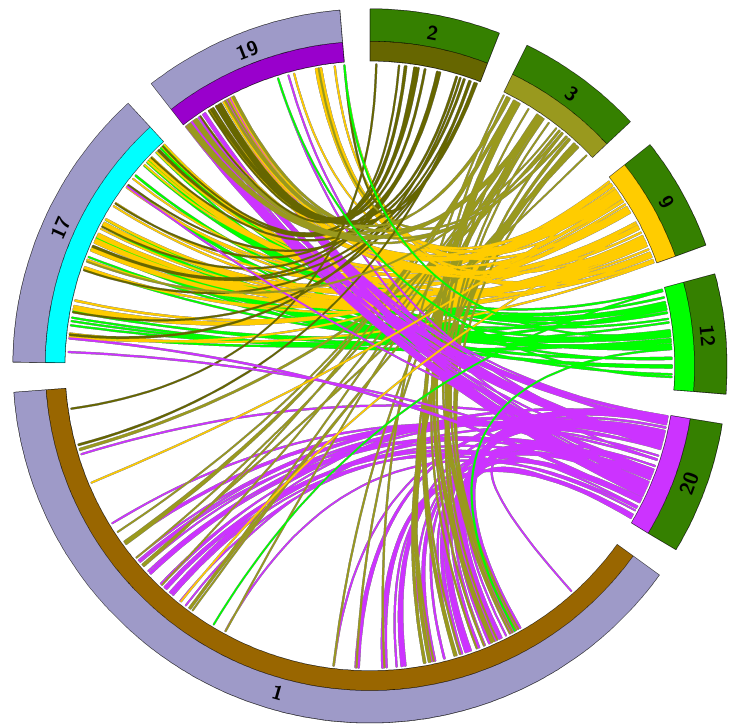

Human x Killifish  
No Fusion

Figure S7. Circos plots of fusions and duplicated chromosomes. Killifish LGs (green segments in each Circos plot) are connected to each comparison chromosome by lines at the physical positions of common orthologous genes (colored by killifish LG ID). Recent and independent fusions of chromosomes in percomorphs (A, tetraodon and stickleback, yellow and orange segments respectively) maintain homology with chromosomes that have not fused in killifish chromosomes as shown by a similar order of orthologous genes in each linkage group. Segments in gar (B, purple segments, left) maintain some synteny and are often homologous with two killifish chromosomes, which is a characteristic of the teleost specific
